# Supplementary material for: Unsupervised explainable AI for molecular evolutionary study of forty thousand SARS-CoV-2 genomes
Source: Research Square preprint supplement (doi:10.21203/rs.3.rs-91227/v1), 2020-10-15
Supplement: Supplementary file 1 [file 4a7d7d52a819b71ec079e72f.docx]

**Supplementary Fig. S1**. Heatmaps of a portion of 7-mers for the BLSOM of 16,384 types of 7-mers presented in Fig. 2a. The choice of the “T” base was made for compatibility reasons with the NCBI reference genome notation, while the actual RNA base in the SARS-CoV-2 genome is a “U”.


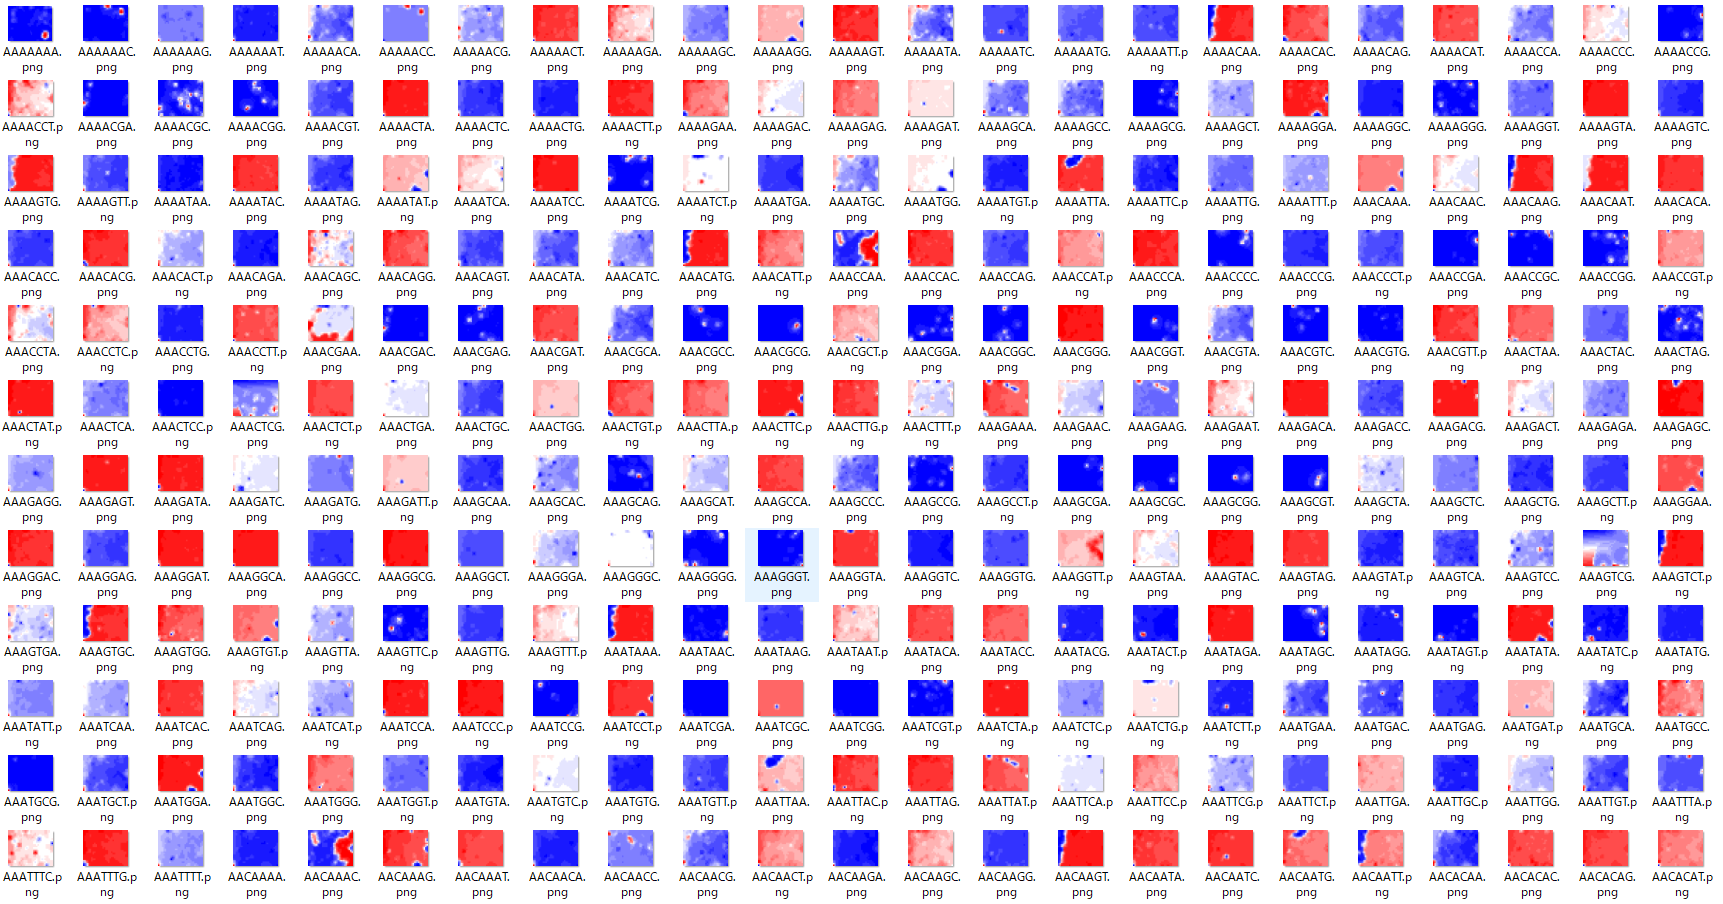


**Supplementary Fig. S2.** Heatmaps of all 7-mers for the BLSOM of 377 different 7-mers presented in Fig. 2c.


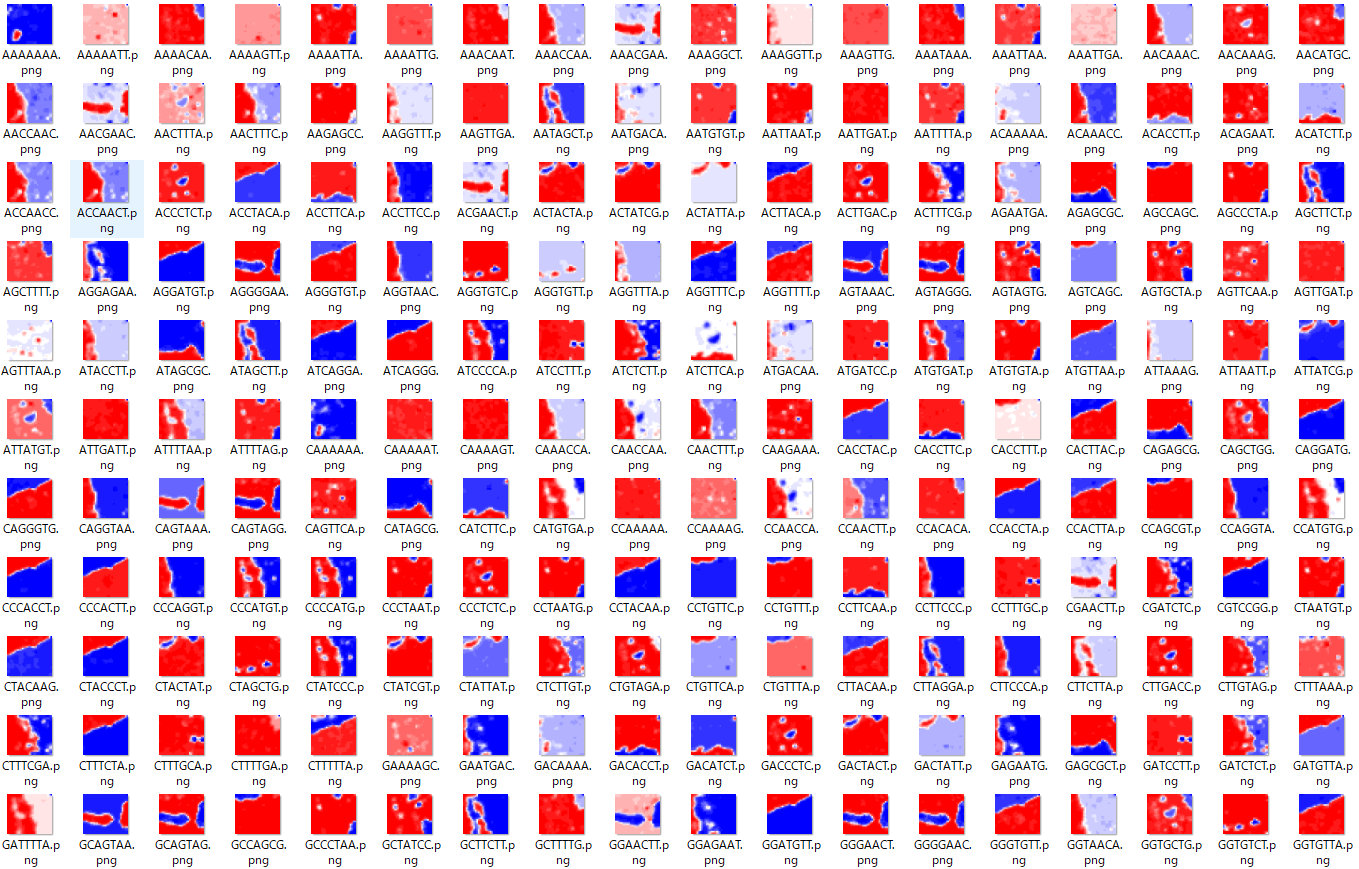

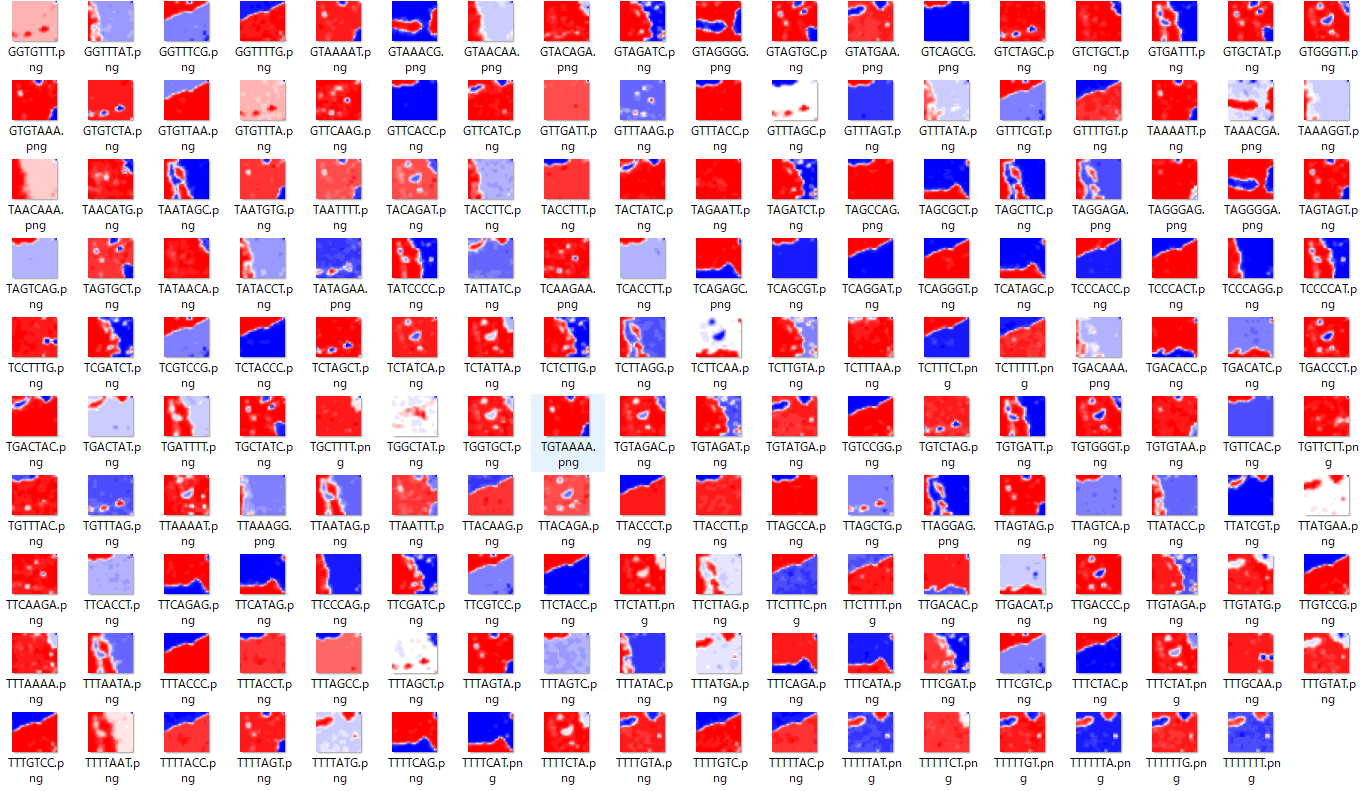


**Supplementary Fig. S3.** Pre- and postmutation sequences of 29-mers with the mutation listed in Table 1: 31-mers for M7. The mutated bases are shown in parentheses; N1 is not a mutation. The 15-mers used for time-series analyses were derived from these sequences.

M1: GCACAUCUAGGUUUC(U)GUCCGGGUGUGACC

M2: AUGUAUUGUUCUUUC(U)UACCCUCCAGAUGA

M3: UACAGUGUUCCCACC(U)UACAAGUUUUGGAC

M4: UGUUCUUUAUCAGGA(G)UGUUAACUGCACAG

M5: CUUGCUGUUUUUCAG(U)AGCGCUUCCAAAAU

M6: AAAGAAAUUUGACAC(U)CUUCAAUGGGGAAU

M7: UCCAGGCAGCAGUAGGG(AAC)GAACUUCUCCUGCU

M8: UCAUGACUAGGUGUC(U)UAGCUGUCCACGAG

M9: UUGUUCUUUUUUUUG(U)UAUGAAAAUGCCUU

M10: UACAGUUUCCUGUUU(C)ACCUUUUACAAUUA

M11: GACACAUGGUUUAGC(U)CAGCGUGGUGGUAG

M12: AGCGAUUAUGACUAC(U)UAUCGUUAUAAUCU

M13: UAGUCGCAACAGUUC(U)AAGAAAUUCAACUC

N1: ACAGUUUAUGAUCCU(NN)UUGCAACCUGAAU

**Supplementary Fig. S4.** BLSOM of 2087 types of 15-mers.


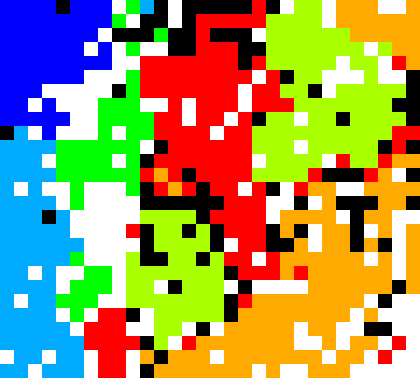


The number of nodes was set as described in Fig. 2a. Nodes are colored as described in Fig. 1.
